# Supplementary material for: Encapsulation of CoSx Nanocrystals into N/S Co‐Doped Honeycomb‐Like 3D Porous Carbon for High‐Performance Lithium Storage
Source: PubMed Central journal article supplement (PMC6145217; doi:10.1002/advs.201800829), 2018-07-20
Supplement: ADVS-5-1800829-s001.pdf [file ADVS-5-1800829-s001.pdf]

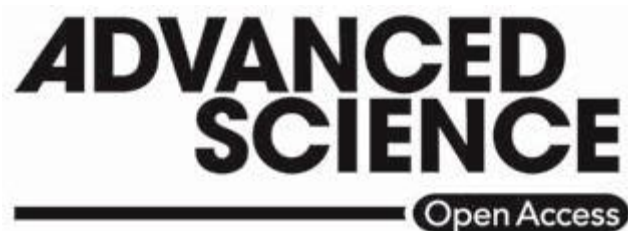

## Supporting Information

for *Adv. Sci.*, DOI: 10.1002/advs.201800829

Encapsulation of  $\text{CoS}_x$  Nanocrystals into N/S Co-Doped Honeycomb-Like 3D Porous Carbon for High-Performance Lithium Storage

Bo Yin, Xinxin Cao, Anqiang Pan,\* Zhigao Luo, Selvakumaran Dinesh, Jiande Lin, Yan Tang, Shuquan Liang,\* and Guozhong Cao\*

Supporting Information for

**Encapsulation of CoS<sub>x</sub> Nanocrystals into N/S Co-Doped Honeycomb-Like  
3D Porous Carbon for High-Performance Lithium Storage**

*Bo Yin, Xinxin Cao, Anqiang Pan\*, Zhigao Luo, Selvakumaran Dinesh, Jiande Lin, Yan Tang,  
Shuquan Liang\*, Guozhong Cao\**

B. Yin, Dr. X. X. Cao, Prof. A. Q. Pan, Dr. Z. G. Luo, Dr. S. Dinesh, J. D. Lin, Prof. Y. Tang, Prof.  
S. Q. Liang, Prof. G. Z. Cao

School of Material Science and Engineering

Central South University

Changsha 410083, China

Prof. G. Z. Cao

Department of Materials Science & Engineering

University of Washington

Seattle 98195, USA

E-mail: [pananqiang@csu.edu.cn](mailto:pananqiang@csu.edu.cn) (A. Pan); [lsq@csu.edu.cn](mailto:lsq@csu.edu.cn) (S.Q. Liang); [gzcao@u.washington.edu](mailto:gzcao@u.washington.edu) (G.  
Z. Cao)

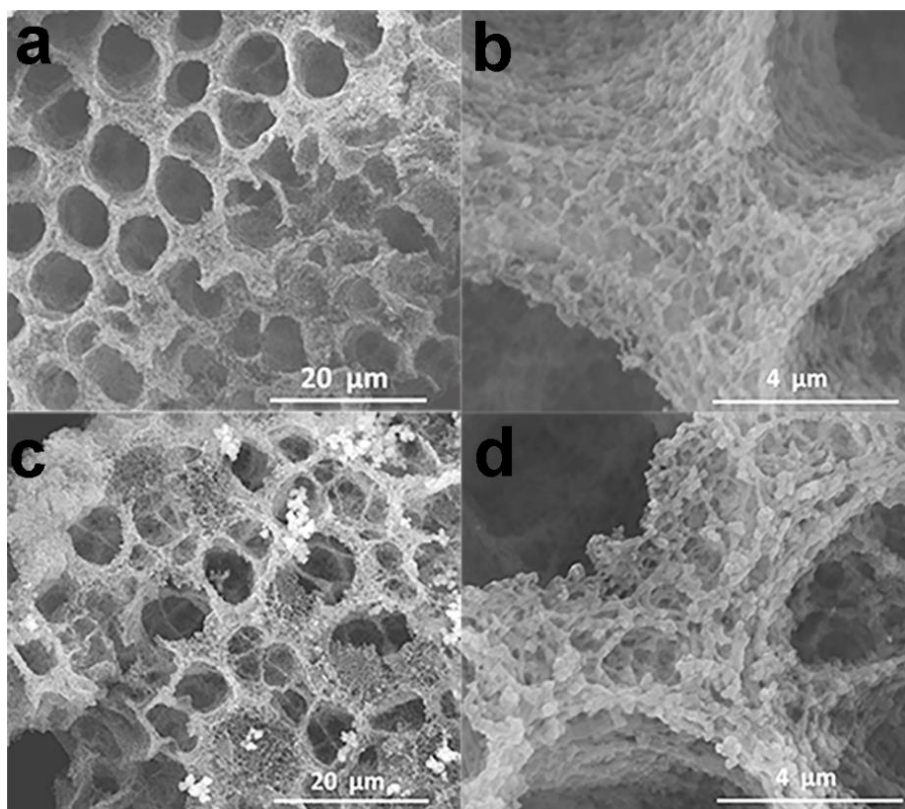

**Figure S1.** SEM images of a, b) Co@PAN-A and c, d) Co@PAN-B.

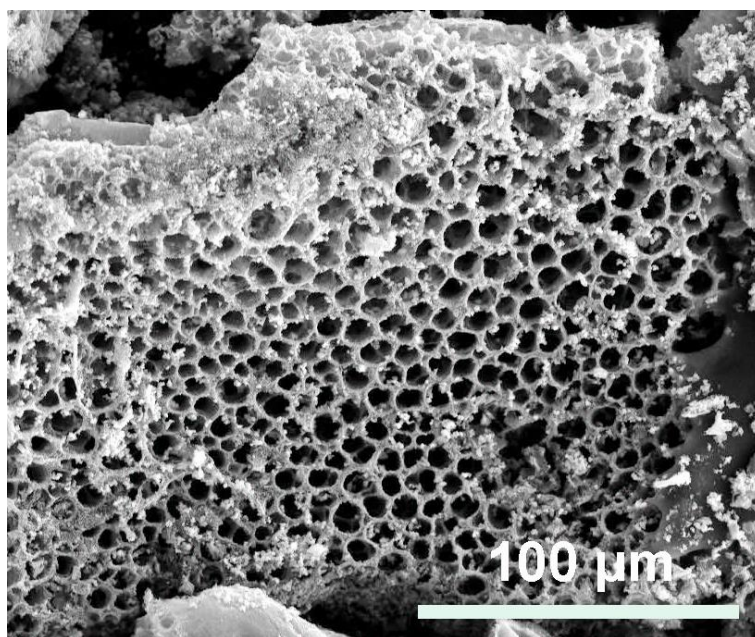

**Figure S2.** SEM image of CS@PC composite at low magnification.

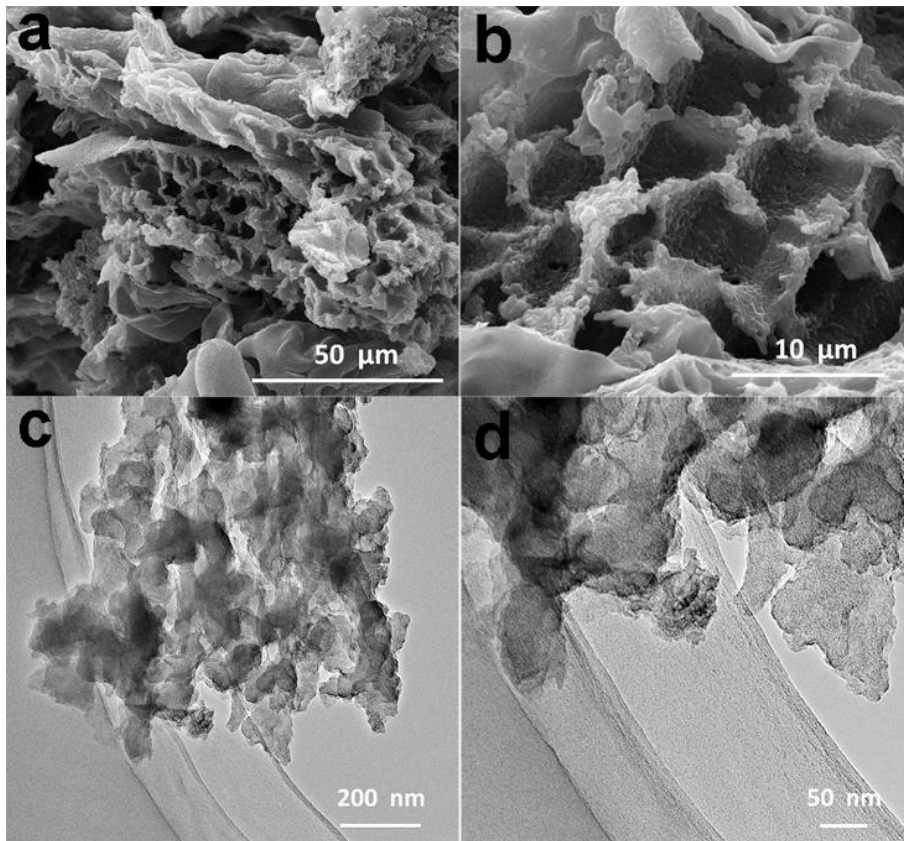

**Figure S3.** a, b) The SEM images and c, d) TEM images of PC.

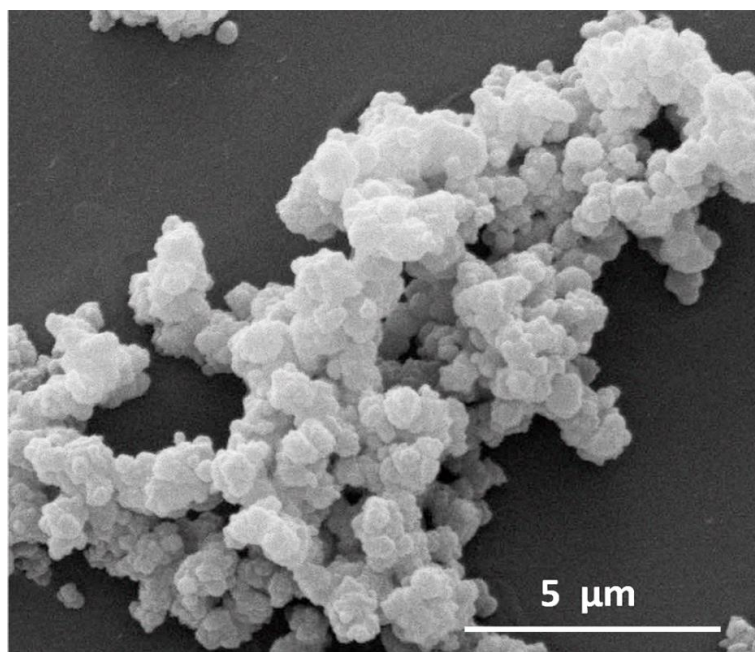

**Figure S4.** The SEM image of CS sample.

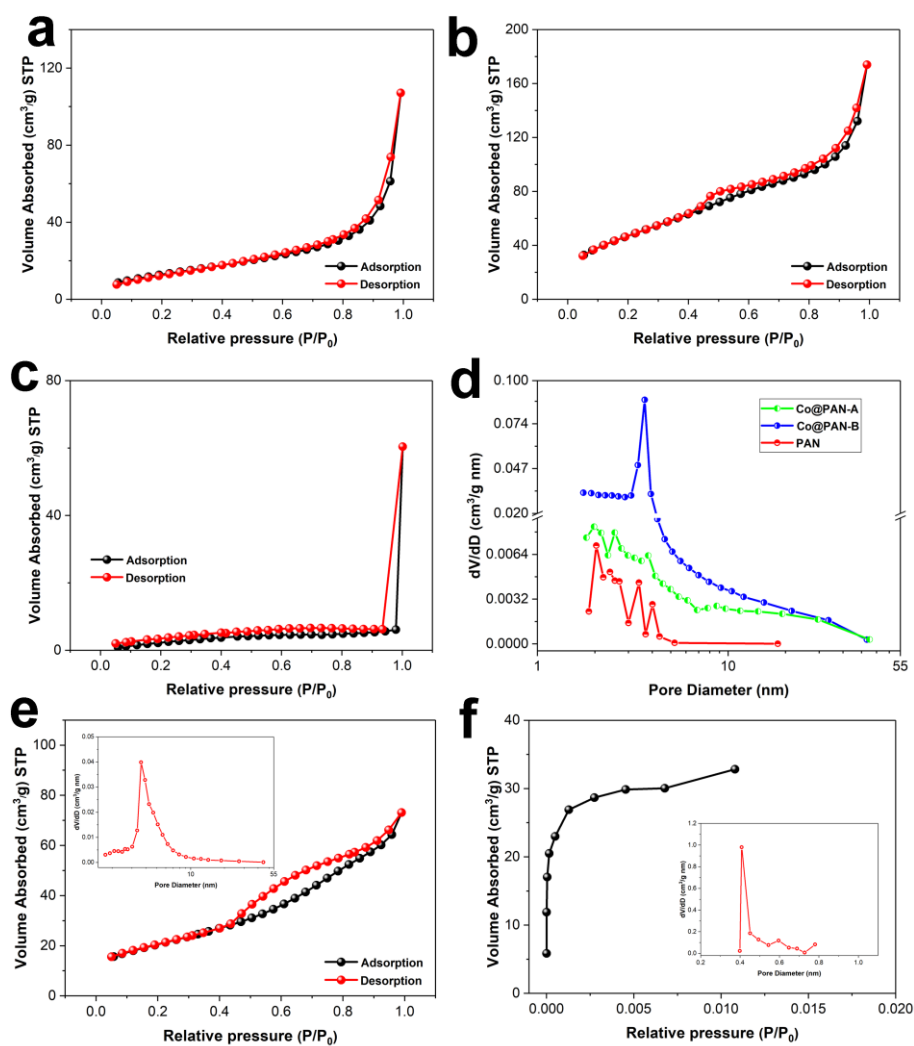

**Figure S5.** Nitrogen adsorption-desorption isotherms of a) Co@PAN-A, b) Co@PAN-B and c) PC. d) The corresponding pore-size distribution curves of the three samples. e) Nitrogen adsorption-desorption isotherm of CS sample and pore-size distribution (inset of e). f) The nitrogen adsorption isotherm of CS@PC at  $P/P_0 < 0.05$  and micropore distribution (inset of f).

**Table S1.** Refined unit cell lattice parameters of CoS, Co<sub>9</sub>S<sub>8</sub>, and Co<sub>1-x</sub>S in CoS<sub>x</sub> composite and standard data of CoS (ICSD Card No. 624857), Co<sub>9</sub>S<sub>8</sub> (ICSD Card No. 660368), and Co<sub>1-x</sub>S (ICSD Card No. 42703).

| Sample                                                       | Lattice parameters |         |         |              |                      | Phase content<br>(wt. %) | wRp<br>(%) |
|--------------------------------------------------------------|--------------------|---------|---------|--------------|----------------------|--------------------------|------------|
|                                                              | a (nm)             | b (nm)  | c (nm)  | $\gamma$ (°) | V (nm <sup>3</sup> ) |                          |            |
| CoS in CoS <sub>x</sub> composite                            | 0.33720            | 0.33720 | 0.51724 | 120.000      | 0.05093              | 75.850                   | 7.76       |
| CoS                                                          | 0.33680            | 0.33680 | 0.51700 | 120.000      | 0.05079              | —                        | —          |
| Co <sub>9</sub> S <sub>8</sub> in CoS <sub>x</sub> composite | 0.99242            | 0.99242 | 0.99242 | 90.0000      | 0.97743              | 20.164                   | 7.76       |
| Co <sub>9</sub> S <sub>8</sub>                               | 0.99273            | 0.99273 | 0.99273 | 90.0000      | 0.97835              | —                        | —          |
| Co <sub>1-x</sub> S in CoS <sub>x</sub> composite            | 0.35952            | 0.35952 | 0.58091 | 120.000      | 0.06503              | 3.986                    | 7.76       |
| Co <sub>1-x</sub> S                                          | 0.36121            | 0.36121 | 0.57752 | 120.000      | 0.06525              | —                        | —          |



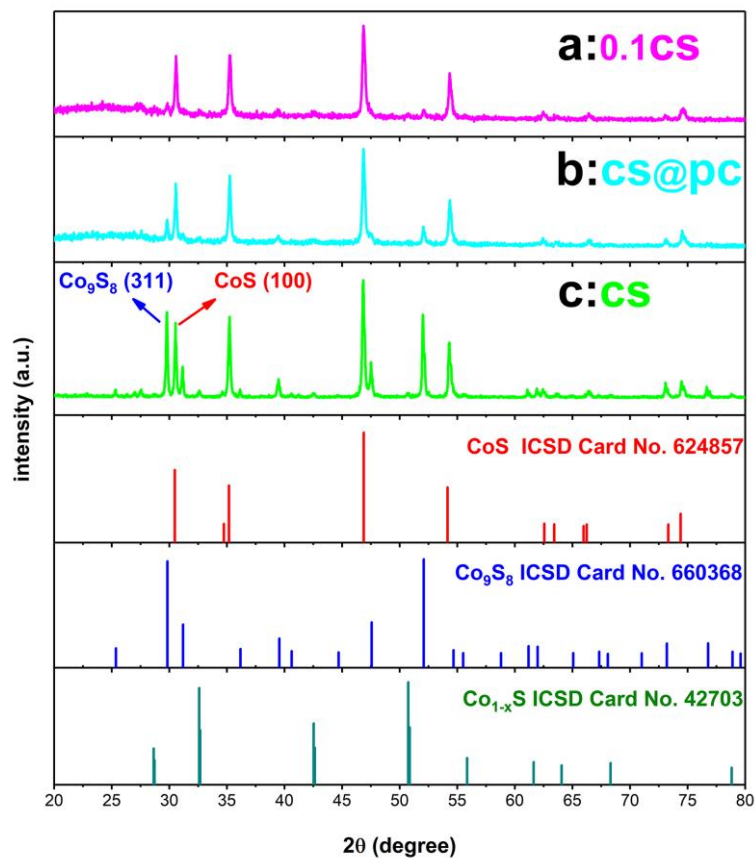

**Figure S6.** The XRD patterns of a) 0.1CS, b) CS@PC and c) CS.

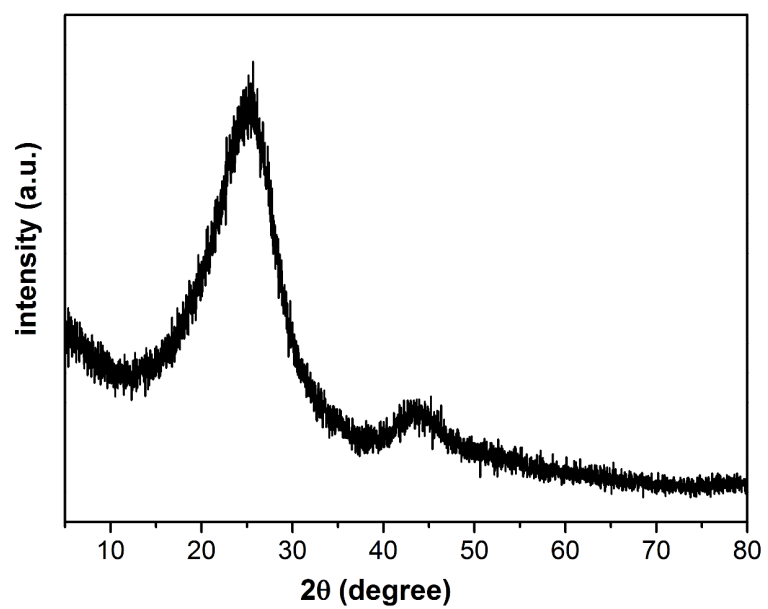

**Figure S7.** The XRD pattern of PC.

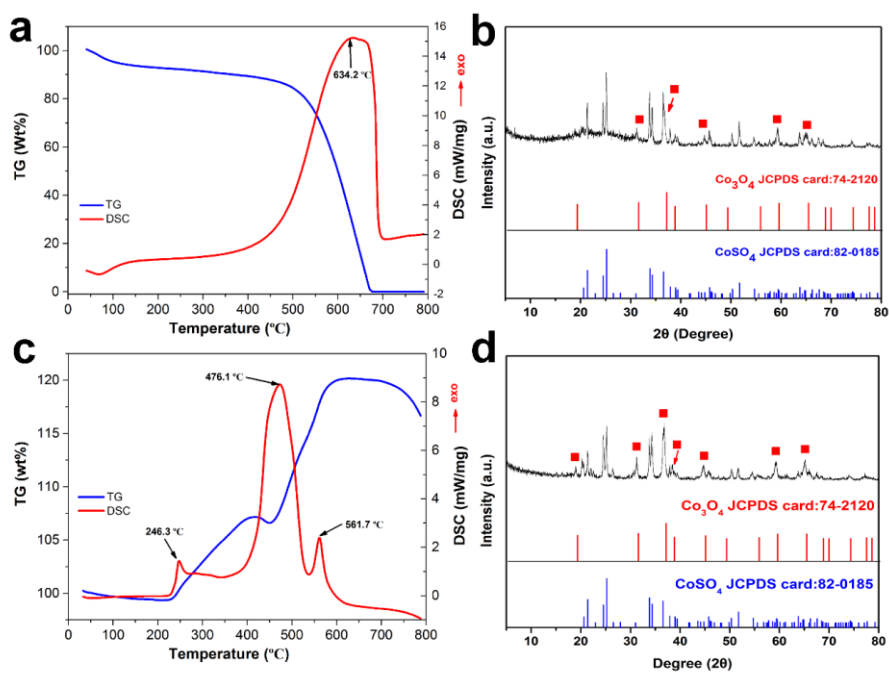

**Figure S8.** TG-DSC curves of a) PC and c) CS. XRD patterns of the residual material after TG-DSC tests of b) CS@PC and d) CS.

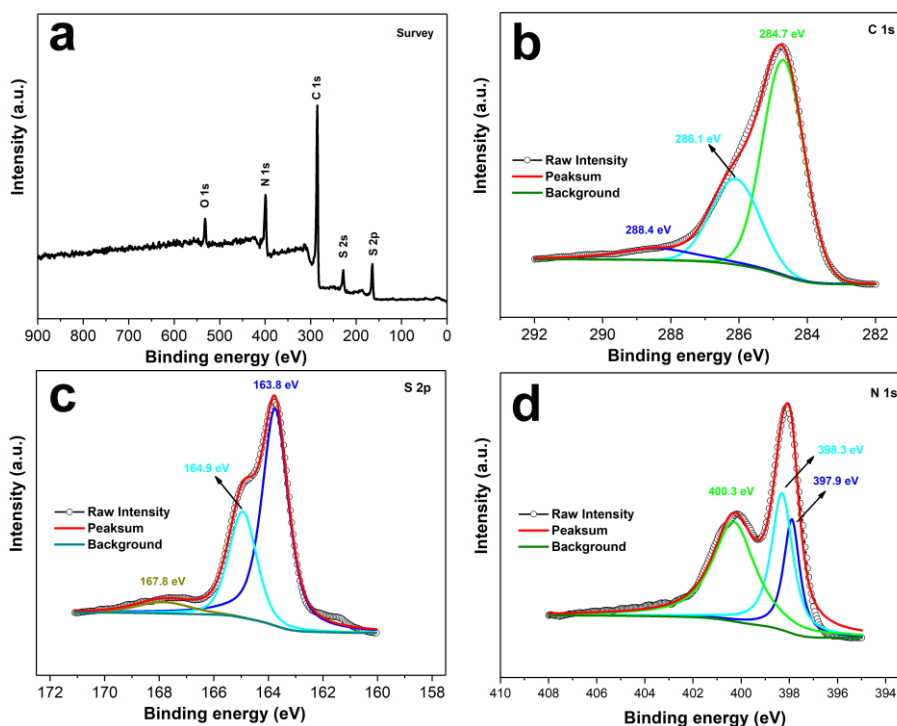

**Figure S9.** a) Typical XPS survey spectrum and the corresponding b) C 1s, c) S 2p, d) N 1s spectra of the pure carbon annealed with sulfur powder. The survey spectrum shows that the C, N, O, S element coexist in the carbon annealed with sulfur powder, except Co. The C 1s and N 1s spectra are similar to that of the CS@PC. And the high-resolution spectrum of S 2p has two main peaks at binding energy 163.8 eV and 164.9 eV, corresponding to C-S  $2p_{3/2}$  and  $2p_{1/2}$ , respectively.

**Table S2.** Elemental compositions of CS@PC and PC-S.

| Samples | C <sub>xps</sub> (At %) | N <sub>xps</sub> (At %) | S <sub>xps</sub> (At %) | O <sub>xps</sub> (At %) | Co <sub>xps</sub> (At %) |
|---------|-------------------------|-------------------------|-------------------------|-------------------------|--------------------------|
| CS@PC   | 60.03                   | 10.12                   | 10.84                   | 14.37                   | 4.65                     |
| PC-S    | 72.67                   | 15.76                   | 7.27                    | 4.3                     | 0                        |

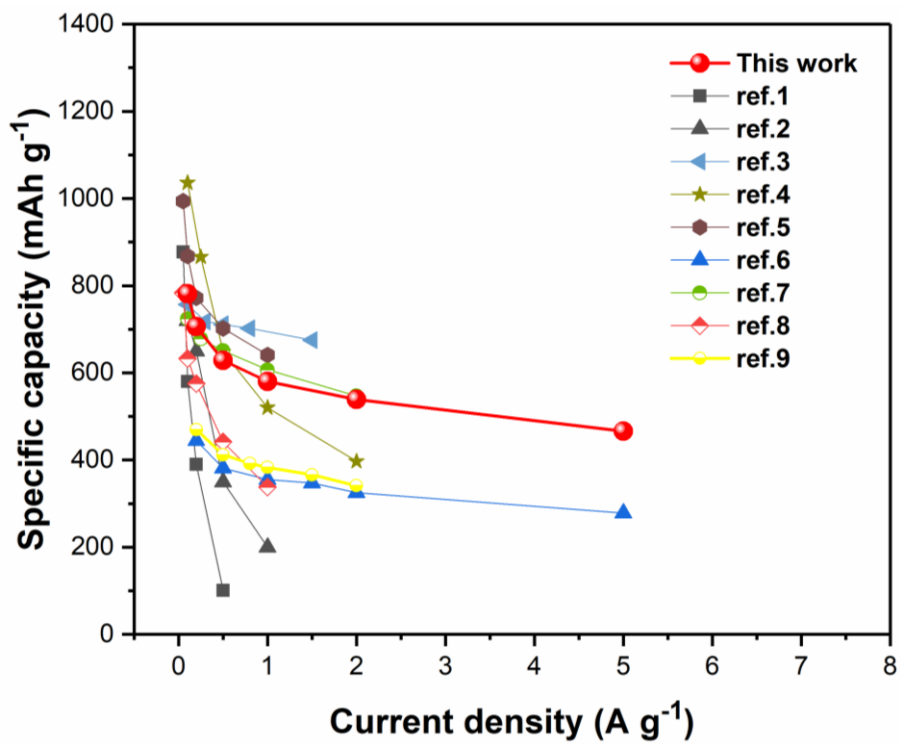

**Figure S10.** A survey of electrochemical properties of cobalt sulfide anodes in lithium ion batteries.

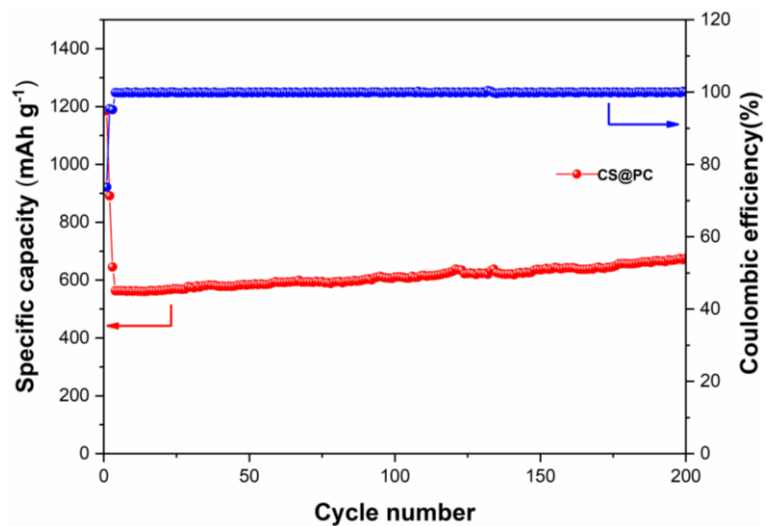

**Figure S11.** The cycling performance of the CS@PC electrode with  $1.1 \text{ mg cm}^{-2}$  mass loading of the active material at the current density of  $1000 \text{ mA g}^{-1}$  between 0.01 and 3 V.

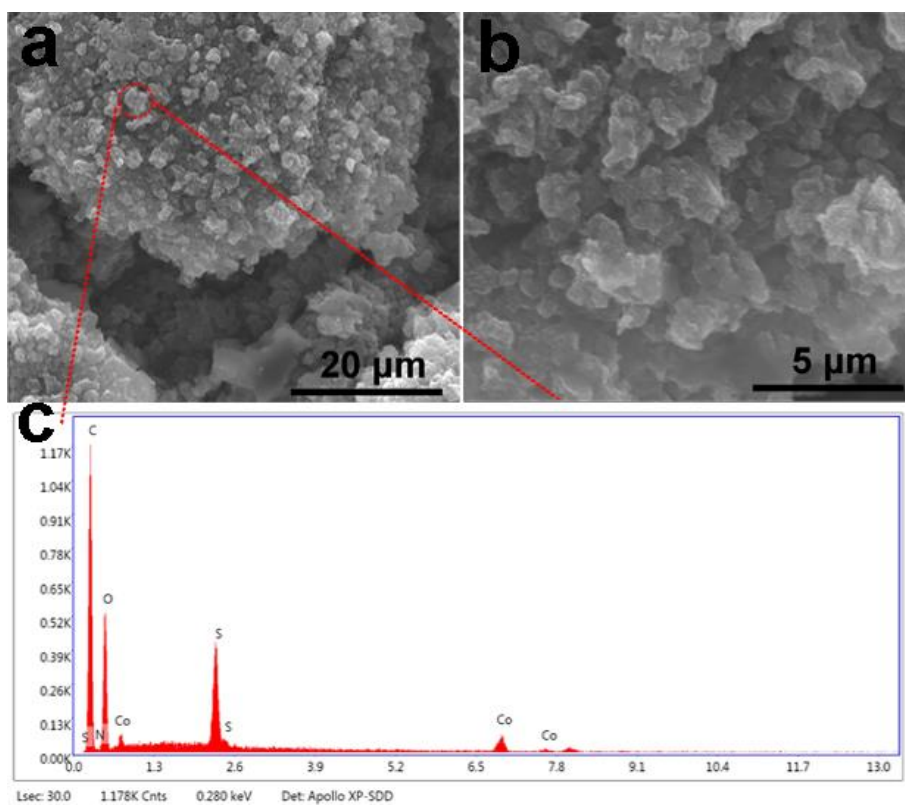

**Figure S12.** a, b) SEM images of CS@PC after 500 cycles at 1000 mA g<sup>-1</sup> at different magnifications. c) The EDX spectrum of the selected region in the picture a (red dotted circle).



**Table S3.** The EIS fitting parameters of CS@PC, PC and CS samples.

| Samples | $R_s$ ( $\Omega$ ) | $R_f$ ( $\Omega$ ) | $R_{ct}$ ( $\Omega$ ) |
|---------|--------------------|--------------------|-----------------------|
| CS@PC   | 4.779              | 10.86              | 138.1                 |
| PC      | 4.713              | 5.539              | 106.4                 |
| CS      | 4.775              | 13.5               | 276.7                 |

The calculation formula is shown as follows:

$$D = \frac{R^2 T^2}{2A^2 n^4 F^4 C^2 \sigma^2} \quad \text{Equation S1}$$

Where R represents the gas constant, T is the test temperature, A is the surface area of electrode, F is the Farady constant,  $n$  represents the number of electrons per molecule attending the charge-discharge reaction, C is the concentration of lithium ion in our composite electrode, and  $\sigma$  is the slop of the line  $Z' - \omega^{-1/2}$  (shown in Figure 7b).

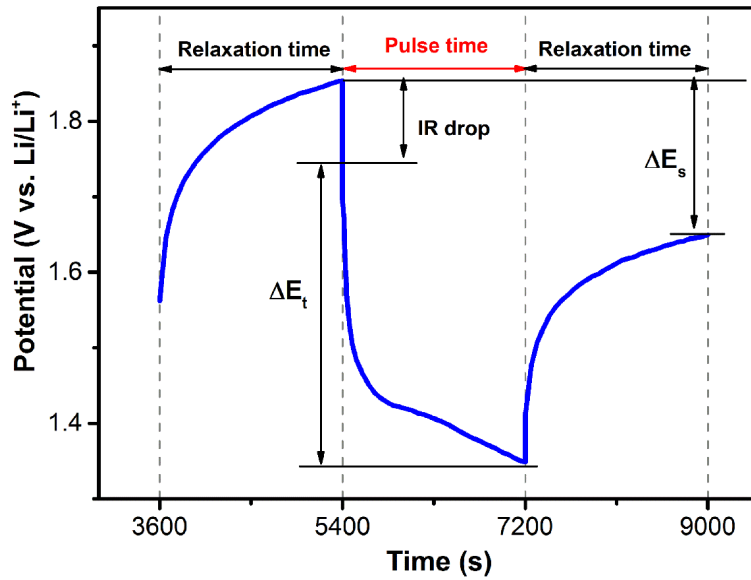

**Figure S13.** E vs. t curves of CS@PC electrode for a single GITT during discharge process.

The lithium diffusion coefficient was measured by using Galvanostatic intermittent titration technique (GITT) and calculated based on equation S2 as follows.

$$D = \frac{4L^2}{\pi\tau} \left( \frac{\Delta E_s}{\Delta E_t} \right)^2 \quad \text{Equation S2}$$

Where  $t$  is the duration of the current pulse (s),  $\tau$  is the relaxation time (s), and  $\Delta E_s$  is the steady-state potential (V) by the current pluse.  $\Delta E_t$  is the potential change (V) during the constant current pluse after eliminating the  $iR$  drop (Figure S13).  $L$  is lithium ion diffusion length (cm); for compact electrode, it is equal to thickness of electrode.

## References

- [1] R. Jin, J. Zhou, Y. Guan, H. Liu, G. Chen, *J. Mater. Chem. A* **2014**, *2*, 13241.
- [2] Y. Wang, J. Wu, Y. Tang, X. Lü, C. Yang, M. Qin, F. Huang, X. Li, X. Zhang, *ACS Appl. Mater. Interfaces* **2012**, *4*, 4246.
- [3] Y. Ko, S. Choi, S. Park, Y. Kang, *Chem. -Asian J.* **2014**, *9*, 572.
- [4] X. Zhang, X. Liu, G. Wang, H. Wang, *J. Colloid Interface Sci.* **2017**, *505*, 23.
- [5] J. Guo, F. Li, Y. Sun, X. Zhang, L. Tang, *Electrochim. Acta* **2015**, *167*, 32.
- [6] F. Han, C. Zhang, B. Sun, W. Tang, J. Yang, X. Li, *Carbon* **2017**, *118*, 731.
- [7] Z.P. Li, W. Li, H. Xue, W. Kang, X. Yang, M. Sun, Y. Tang, C. Lee, *RSC Adv.* **2014**, *4*, 37180.
- [8] Z. Huang, Y. Wang, J. Wong, W. Shi, H. Yang, *Electrochim. Acta* **2015**, *167*, 388.
- [9] F. Han, C. Tan, Z. Gao, *J. Power Sources* **2017**, *339*, 41.
